# Supplementary material for: Palaeoecology of a billion‐year‐old non‐marine cyanobacterium from the Torridon Group and Nonesuch Formation
Source: PubMed Central journal article supplement (PMC4995629; doi:10.1111/pala.12212), 2015-11-09
Supplement: PALA-59-89-s001.pdf [file PALA-59-89-s001.pdf]

## SUPPORTING INFORMATION

### PALAEOECOLOGY OF A BILLION YEAR OLD NON-MARINE CYANOBACTERIUM FROM THE TORRIDON GROUP AND NONESUCH FORMATION

by PAUL K. STROTHER *and* CHARLES H. WELLMAN

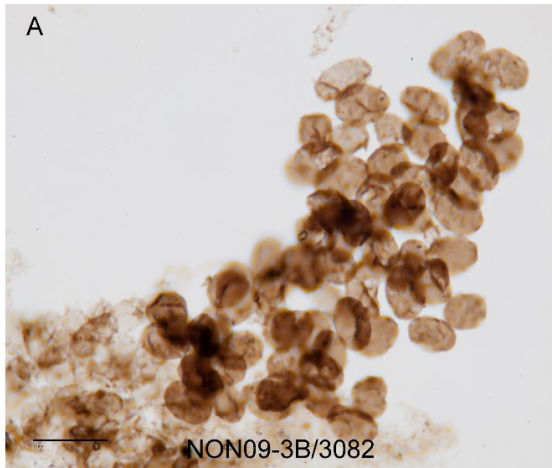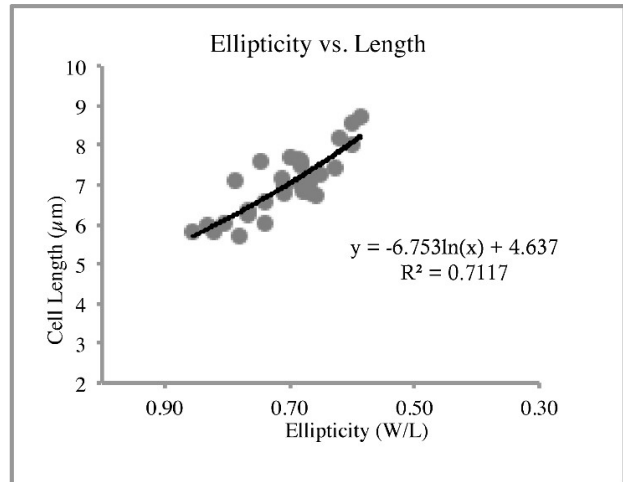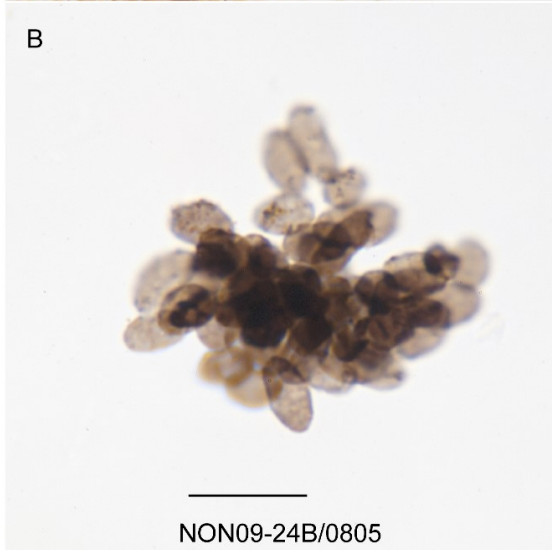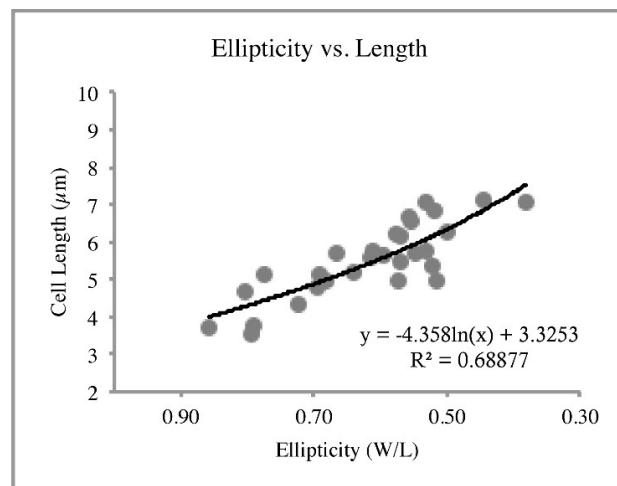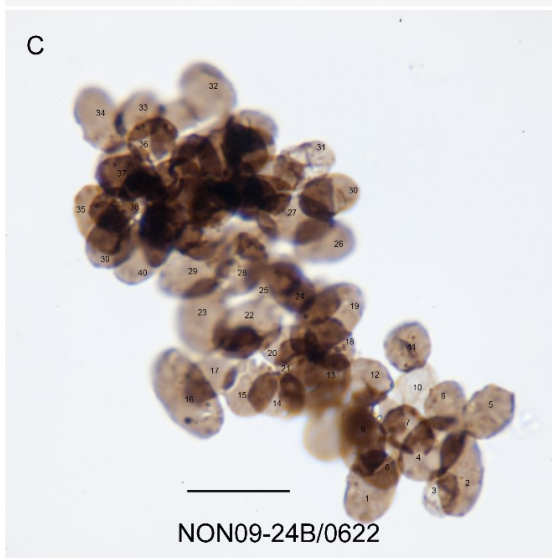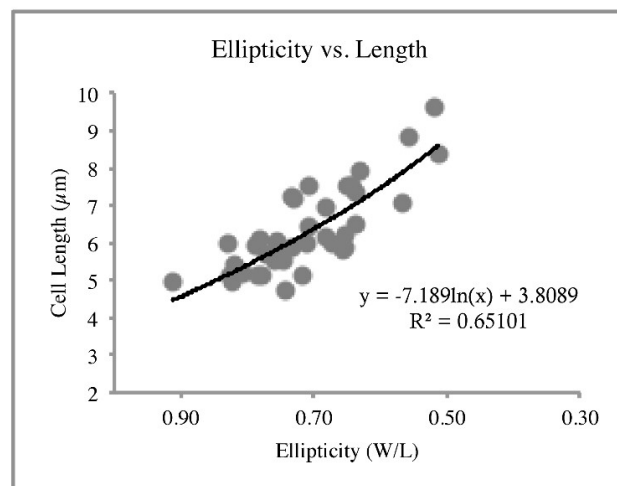

**FIG S1.** Three populations of *E. lacustrina* with their corresponding size data. A, population from sample NON09-24B with corresponding plot of length vs ellipticity (length/width). B, another population from sample NON09-24B with corresponding plot of length vs ellipticity (length/width). C, population from sample NON09-3B with corresponding plot of length vs ellipticity (length/width).
